# Supplementary material for: Efficient Editing of the Nuclear APT Reporter Gene in Chlamydomonas reinhardtii via Expression of a CRISPR-Cas9 Module
Source: MDPI journal article supplement (doi:10.3390/ijms20051247), 2019-03-12
Supplement: s1 [file s1]

*Chlamydomonas reinhardtii*- Adenine phosphoribosyltransferase gene (apt gene) Gene ID: 5717232

CTTATTACAAGGTGAATCAAACGCATTTTGTTCAGTCTCTCTGAGTCTCGCGCCGCCCGCAACTTAC  
APT-FW  
AACCTTTTACGACACAAGCAACGCAAAGATGGCTGACGTTGAGGCCAAGAAGGAGATTATCAAGAATGCCAT  
TCGTGGCATTCTGACTTTCCCCACAAGGGTATTCTGTTCTGGGATGTCACCACCATCATGCTGAACCAC  
CAGGCGTTCCAGTACAGCATTGACCTGTTTCGCTGAGCAGTACAA**GGACAAGAAGATTGACGTGGTGGCGG**  
GTAGGTGCAAGGGCAATGGAAGCAAGCATCGTGGGAACGCCGAAGCTATGCTGGGGTGGGGCAGGTAGAC  
TGGCACCCCGCCCCGCCGGCGCCGTTATCGTCGCTTGCACCGTGCTTTACCAACACCCCCCCCCCGCGCG  
CCCGCGCAGGCTTTGAGGCTCGTGGCCTCATCTTTGGCGCTCCTCTGGCTCTTGCGCTTGGGGTAGCCTT  
TGTGCCGCTGCGCAAGCCCGGCAAGCTGCCCGGTACGTCAGCTGGCGTGCGGTTATGTTATGCGATCATG  
TAGTGAGGGAGCTTGGCACGGCCGCCAACCGGGATCCGTGTAGCAGAGATATGGCGACCCCGGCCGGTT  
AAACCGCTGCACTGCGAGGGCCGCGGGCCGACCCTGTTGGCAATGAGGGGCGGCGGCTGGCCGCCAGGG  
CTGGTGCCCGGCGGTAACCGGTGGAGGGTCGTTGATGCGCGCACTTTGGTGACTCTTAAGGTGCAAACAG  
AAGCTGTAGTTGGCAGCTTTTACGGTATCCTAACGCCTTTGGTCATGGGATTCATGCAGGTGACAAGATCA  
GCGAGGAGTACAAGACCGAGTACAGCACGGACAAGATTGAGATGCACGTGGGCGCCAT**CCAGCCCGGGCA**  
**ACGCGTTGTGCT**GGTAAGCGGGCCTGGTAGTGACGCGGACGCAATGCTATGCAGGCTGTGAGGAGATGG  
ACATGAGATGCTCGCCTTTTTGTGAAGACGGCAGCATGAGCAACCAAACAGTGATAGCTGTGAGACTGTC  
ATCCGCTGTAGATCAGTTTGTCCGGGGCTTCAGAGGATGATTGTTTGTACCGCATTGATTGTGACGTTA  
NVDF 278  
CACACTGCCTCCGTTCATCCAGTACATGACCGCTTCCCAACACCTCAAACGCATCAGTAAACCCCTGCGGCG  
CAGTAGCACATCGTGCATCGCGCCATGGATAGACTAATGCCGGCCCCCTTCATGTTTGAACCCATTGCAGG  
TTGATGACCTGATTGCCACCGGCGGCACCCCTTGCCGCCGGCATCAACCTCGTCAGTAAGTCTCACATGCG  
CCTTACACACACGGTGCACTGCACTTTCTTCCATCTTCAATGGTGGTCTGCGCCATGAACGCAAGCAATG  
CCACTACCCTTGCCCTTTACATGGAATCCAGCCACTTCTGCCATCATAACCCCTCACCTACCGGCACTTCT  
CCAGTACCACTTCAACTCATTGCAAACCTTAGCCACGCACCCCAAGGCCGCTCACCACGAATCCATTCGCC  
CTCACCGCCCCACAGAGAAGGCCGGCGGTGTGGTGGTGGAGGCCGCGTGCATCGAGCTGCCCTTCCCT  
CAAGGGCCGCGACAAGATCCAGGGCACCGACCTCTTCGTGCTCGTGGAGAAGGAGGGCCTGTAAGCAACT  
CCACTGCCAAGACCGCAGCCGTGCATATCTAGCTAGTGACCCGGCAGCCGTATGAAAGCATTCTCGGTC  
TGTGCACCGTCGCACATTATGCAGCCGCAACAGGCCTTGGATCGACCACGGCACGTCGAGCCGAAGTGCC  
CGACCTAGTACACTTGACCACGGTTGATTGCTTTGGAAGTCTGTGATCGCAACCTTAAACCCGATAGTAC  
ATTGGCCTGGGCCACGGCGCCACCCCGGCGCAGCGCGTGAGCCTGACTGGTTAGGTGAAGCCCTCCGGG  
AGCTCATTACCCCGGGGGCACCGGTGCCGTGACTACTGTTGCCGGTATGGGCTGGCACGTTTAAGTGCGT  
GCGCCATTGAGCTCACGAAGTGGTCCTTTGTGAGGTTGCTCCCGGGCTTGACGCCCACCTCCGCAAGGTC  
CGCTGCTGGCCCCAAGATGACTTGAAGCGCACGGTTTGCTGCTCTGCCGTGACCGTGCCGCGTTTTGTA  
ATGTGGAACATGCCAAACATTGTTTCCAAGTCCTGCTCGTTGATGAGGGGTGCTGTCCCCGCGACCTTCA  
CATTCTCAAGGTAC
