# Supplementary figures and images for: Efficient Editing of the Nuclear APT Reporter Gene in Chlamydomonas reinhardtii via Expression of a CRISPR-Cas9 Module
Source: MDPI journal article supplement (doi:10.3390/ijms20051247), 2019-03-12

# Wild-type and transformed *Chlamydomonas reinhardtii* lines with and without 2-FA

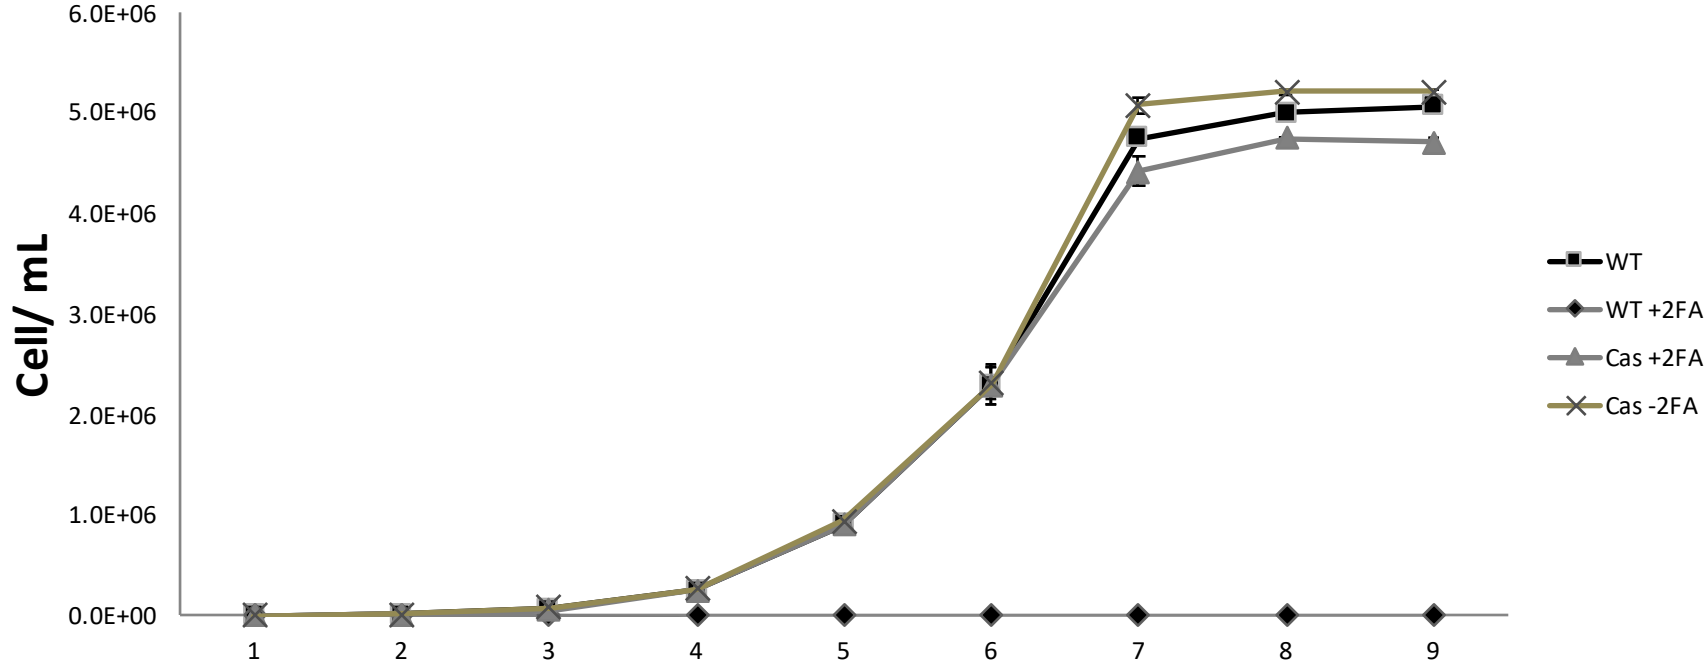

Supplement: s1 [file s1]

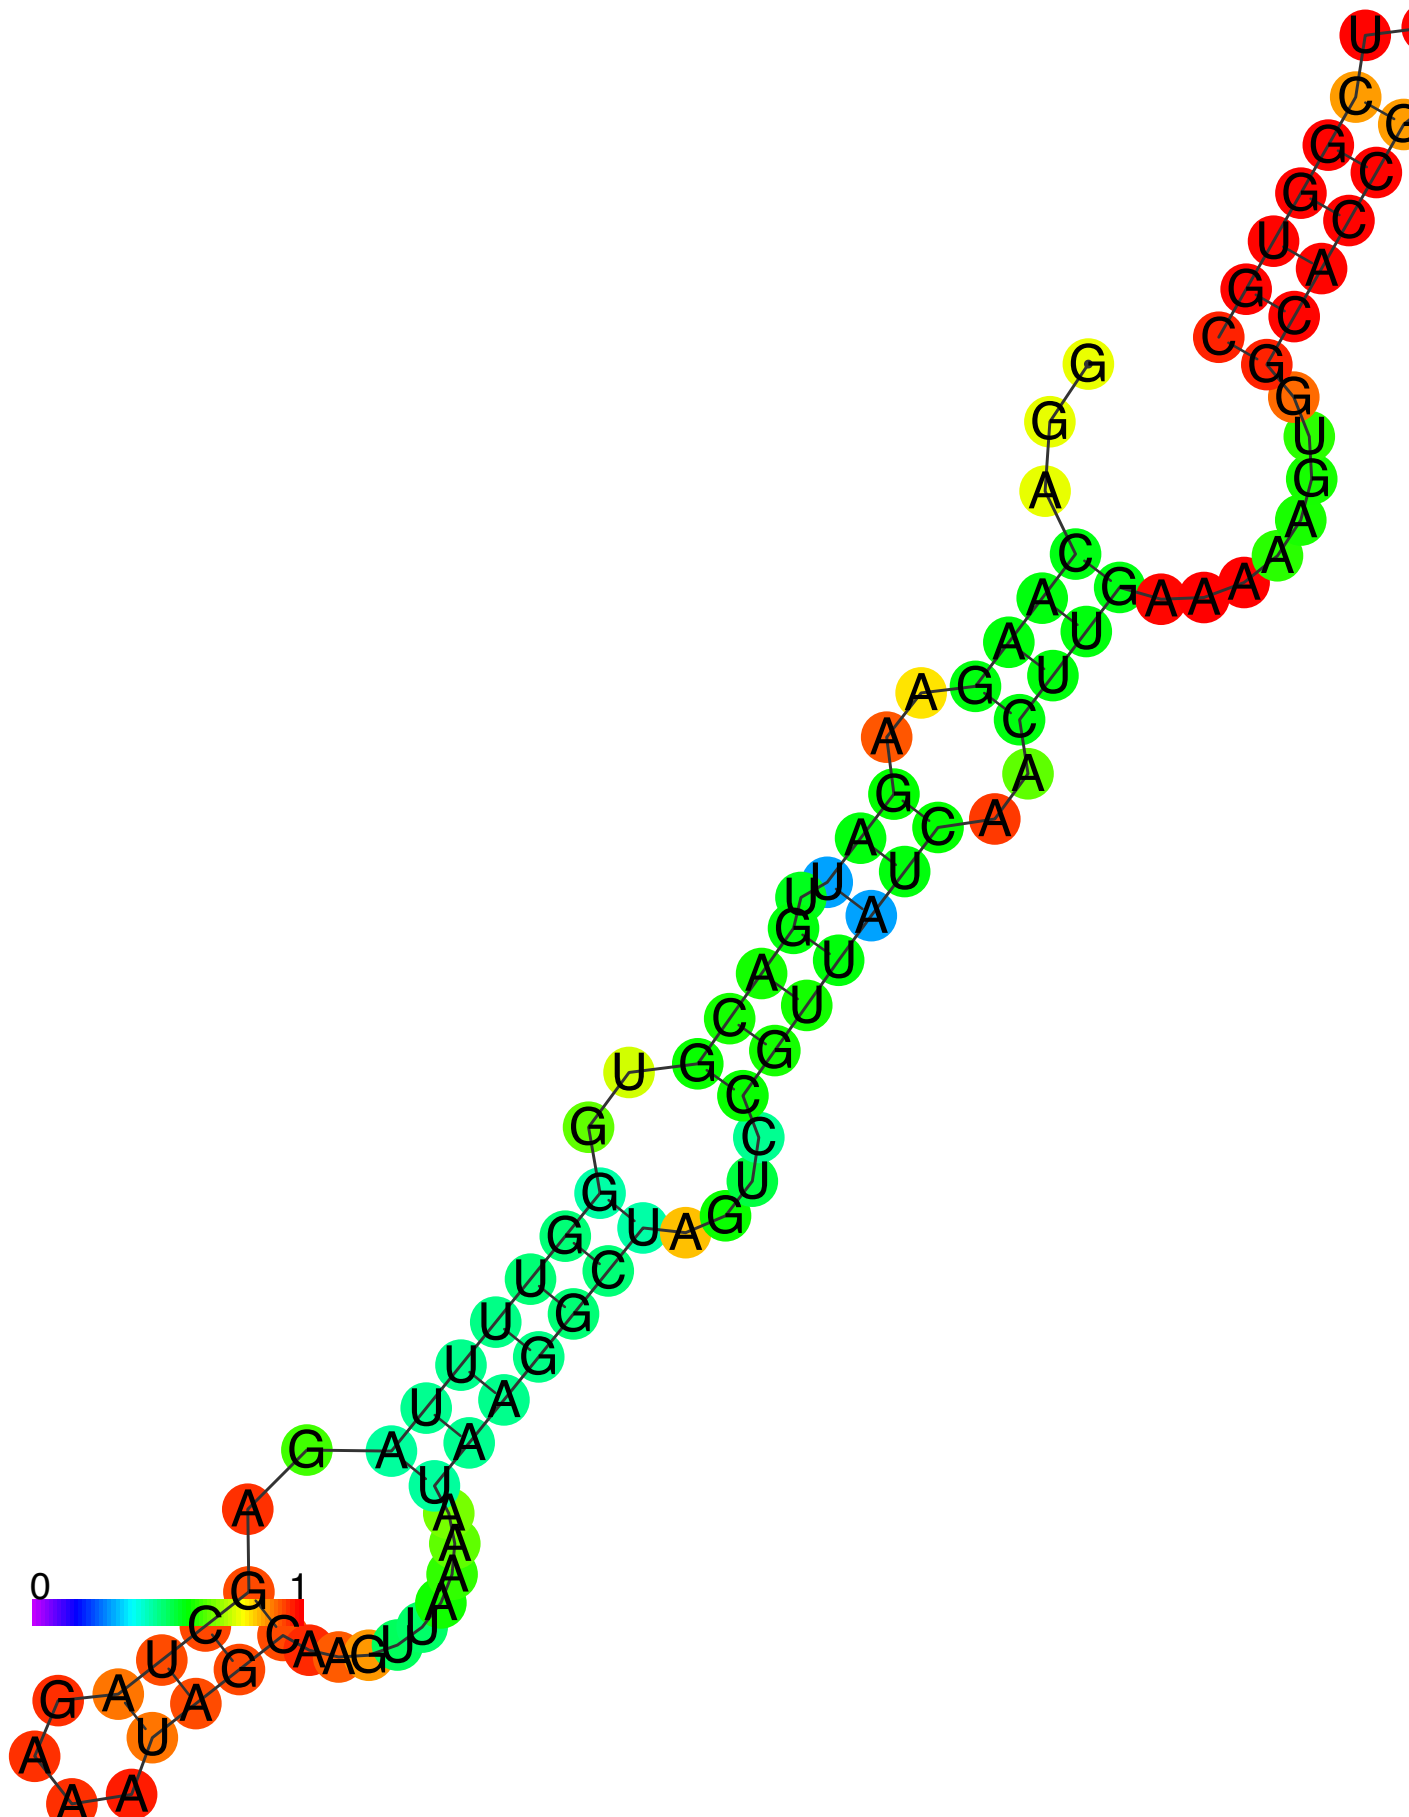

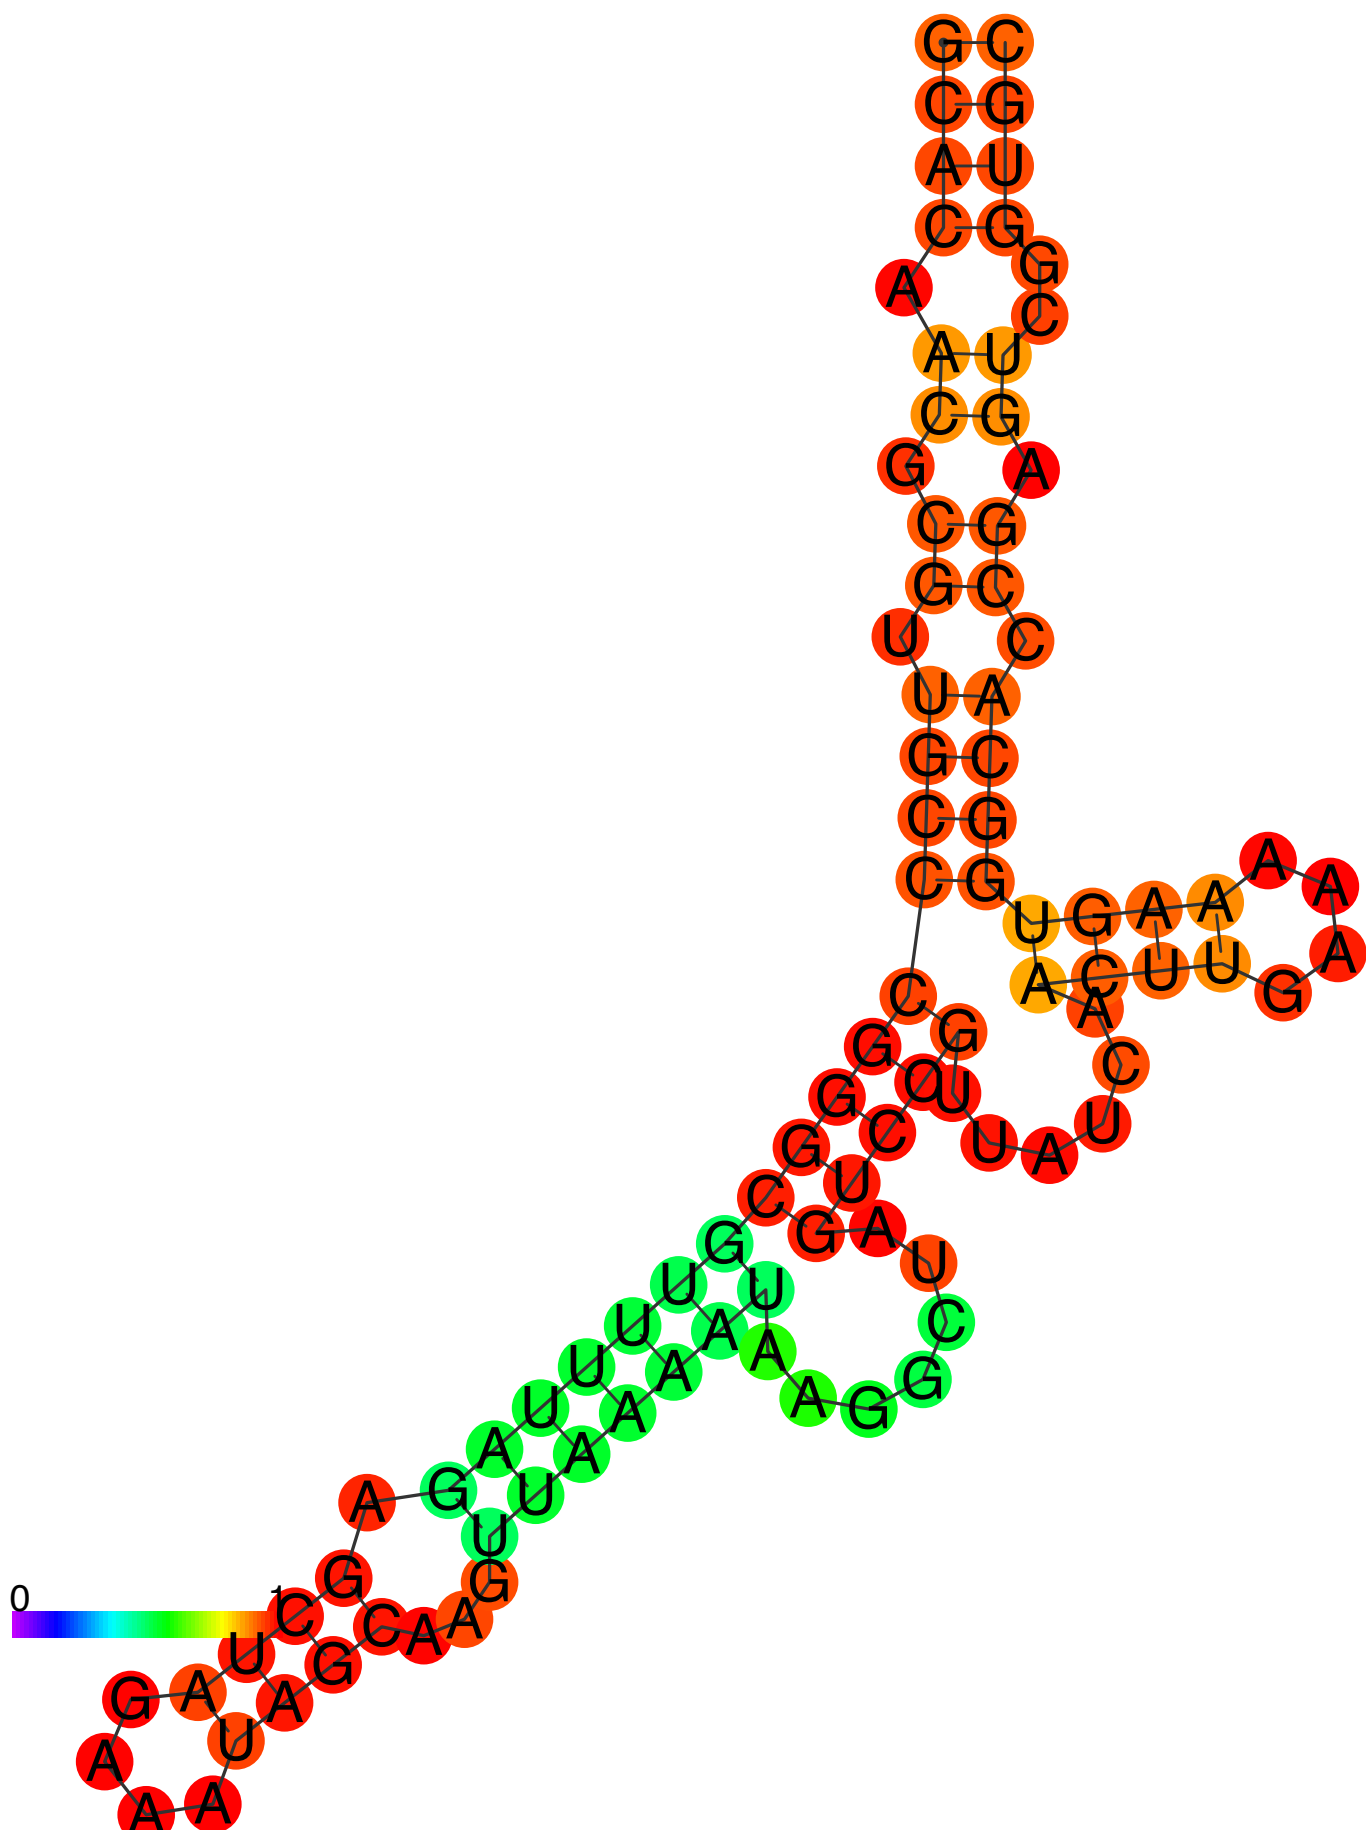

Supplement: s1 [file s1]
